# Supplementary material for: Selective growth of two-dimensional phosphorene on catalyst surface
Source: Royal Society of Chemistry journal article supplement (doi:10.1039/c7nr08507a), 2018-01-01
Supplement: c7nr08507a1.pdf [file c7nr08507a1.pdf]

## Supporting Information

# Selective Growth of Two Dimensional Phosphorene on Catalyst Surface

*Lu Qiu<sup>1,2,3</sup>, Jichen Dong<sup>1</sup> and Feng Ding<sup>\*,1,2,3</sup>*

<sup>1</sup> Center for Multidimensional Carbon Materials, Institute for Basic Science (IBS),

Ulsan 44919, Republic of Korea

<sup>2</sup> Department of Materials Science and Engineering, Ulsan National Institute of

Science and Technology (UNIST), Ulsan 44919, Republic of Korea

<sup>3</sup> Institute of Textile and Clothing, Hong Kong Polytechnic University, Hung Hom,

Kowloon, Hong Kong, People's Republic of China

E-mail: [gniding@gmail.com](mailto:gniding@gmail.com)

## S1. Method of Calculation

In all the calculations, the original lattice parameters of  $\alpha$ ,  $\beta$ ,  $\gamma$ , and  $\delta$ -phosphorene were adopted from reference,<sup>1</sup> and then were further optimized (shown in Figure S1). The seven transition metal surfaces were simulated by three atomic layer thick slab models with all the atoms in the bottom layer fixed. Then the four types of phosphorenes were placed on the surfaces by carefully choosing the supercell size of the system, which ensures the lattice mismatch between phosphorene and substrate to be lower than 3%. As an example, the models of  $\alpha$ -,  $\beta$ -,  $\gamma$ - and  $\delta$ -phosphorenes on  $\beta$ -Sn(100) surface are shown in Figure 1 and more detailed parameters of other models are here shown in the table S1. In order to avoid the interaction between neighboring images, the neighboring slabs were separated by a vacuum layer of  $\sim 15$  Å.

Density functional theory (DFT) calculations were performed *via* the Vienna ab initio Simulation Package (VASP),<sup>2,3</sup> with projected augmented wave (PAW) method<sup>4</sup> describing the interactions between valence electrons and ion cores. Generalized gradient approximation (GGA) energy was used for the exchange-correlation<sup>5</sup>. To apply the weak van der Waals interaction into the system, the DFT-D3 method<sup>6</sup> was applied. A plane-wave cutoff energy of 400 eV was adopted and all the structures were fully relaxed with energy and force convergence criteria of  $10^{-4}$  eV and  $10^{-2}$  eV/Å, respectively. The Brillouin zone was sampled with different Monkhorst–Pack mesh k-points<sup>7</sup> with a separation criterion of 0.03.

**S2. Optimized atomic structures of  $\alpha$ ,  $\beta$ ,  $\gamma$ , and  $\delta$ -phosphorene in vacuum and on transition metal surfaces.**

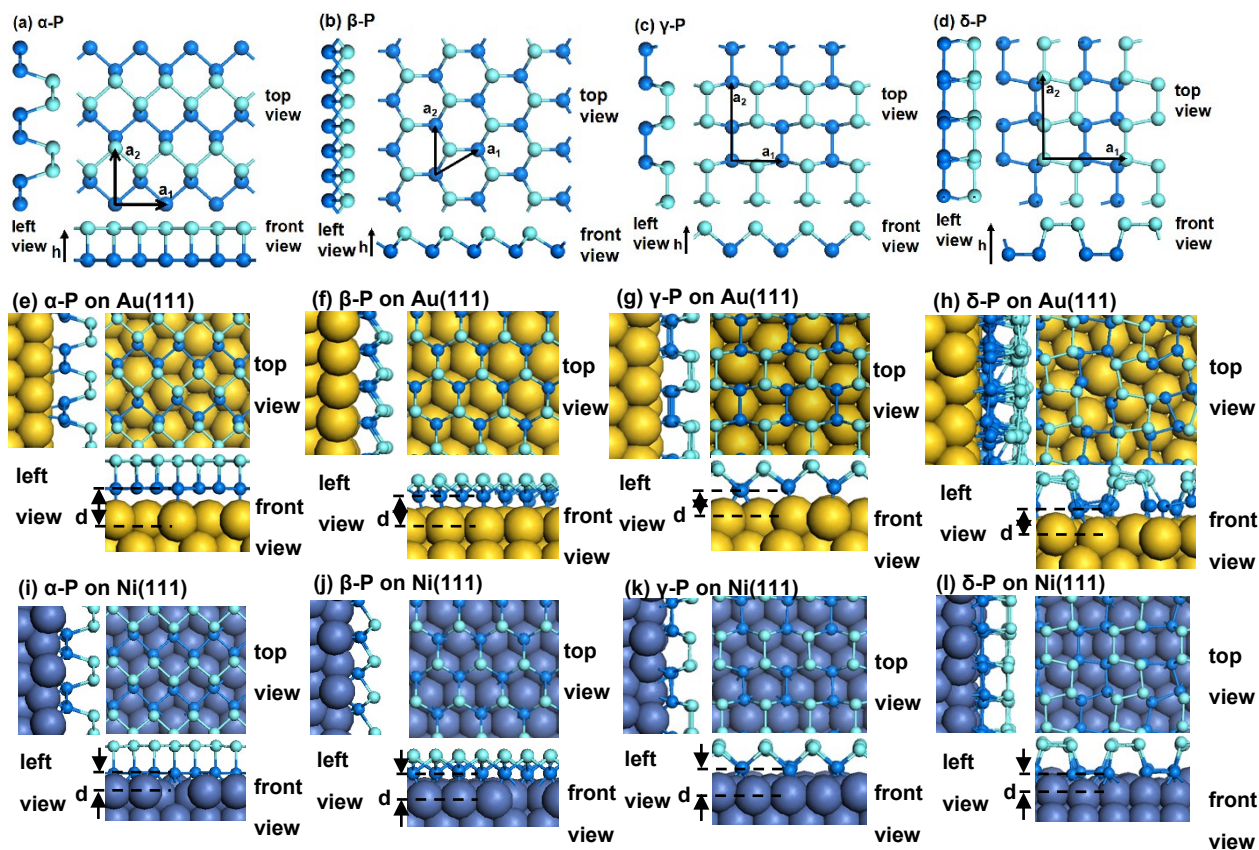

**Figure S1.** Optimized atomic structures of  $\alpha$ ,  $\beta$ ,  $\gamma$ , and  $\delta$ -phosphorene in vacuum (a, b, c, and d), on Au(111) (e, f, g, h) and Ni(111) (i, j, k, and l) surfaces.. The optimized lattice parameters are shown in table S1.

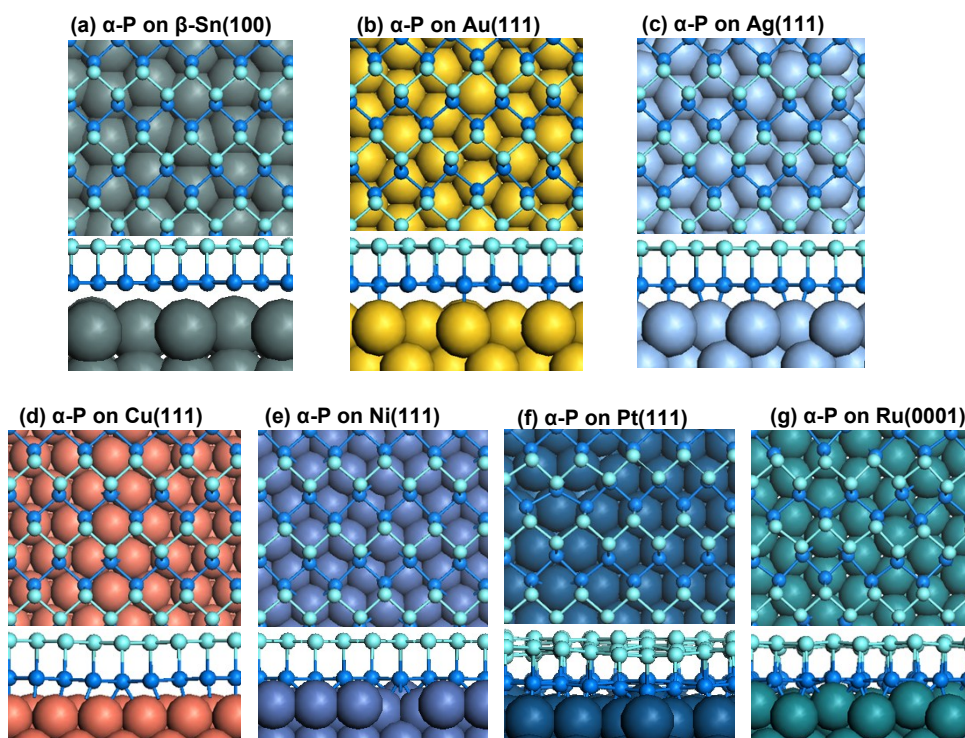

**Figure S2.** Optimized atomic structures of  $\alpha$ -phosphorene on  $\beta$ -Sn(100), Au(111), Ag(111), Cu(111), Ni(111), Pt(111), and Ru(0001) surfaces in top and front views, respectively.

### S3. A summary of the calculated parameters.

**Table S1. Calculated parameters of all the phosphorene-on-substrate models.**  $a$  and  $b$  are the lattice parameters of the modelled supercells.  $a_p$ ,  $b_p$ ,  $a_m$  and  $b_m$  represent the lattice mismatches (along  $a$  and  $b$  directions) in percentage for phosphorenes and the metal substrates, respectively, in comparison with the freestanding phosphorene and bulk metal;  $d$  is the distance between the phosphorene and the metal substrate after optimization;  $E_f$  and  $E_b$  are the formation energy and binding energy as defined in this main text.

|                  |          | Supercell | supercell | mismatch       | mismatch       | distance | $E_f$     | $E_b$     |
|------------------|----------|-----------|-----------|----------------|----------------|----------|-----------|-----------|
|                  |          | $a$ (Å)   | $b$ (Å)   | $a_p; b_p$ (%) | $a_m; b_m$ (%) | $d$ (Å)  | (eV/atom) | (eV/atom) |
| vacuum           | $\alpha$ | 3.31      | 4.38      | /              | /              | /        | 0.0       | /         |
|                  | $\beta$  | 3.28      | 3.28      | /              | /              | /        | 0.034     | /         |
|                  | $\gamma$ | 3.37      | 5.28      | /              | /              | /        | 0.133     | /         |
|                  | $\delta$ | 5.52      | 5.52      | /              | /              | /        | 0.078     | /         |
| $\beta$ -Sn(100) | $\alpha$ | 23.17     | 21.90     | 0;0            | 0.5;1.4        | 2.98     | -0.155    | -0.155    |
|                  | $\beta$  | 22.96     | 22.72     | 0;0            | 1.4;2.3        | 2.66     | -0.127    | -0.161    |
|                  | $\gamma$ | 23.58     | 15.83     | 0;0            | 1.3;0.0        | 2.52     | -0.088    | -0.222    |
|                  | $\delta$ | 22.06     | 5.60      | 0;0.3          | 0.7;3.0        | 2.90     | -0.096    | -0.175    |
| Au(111)          | $\alpha$ | 9.93      | 8.76      | 0;0            | 2.9;1.0        | 2.63     | -0.226    | -0.226    |
|                  | $\beta$  | 22.96     | 22.96     | 0;0            | 2.8;2.8        | 2.40     | -0.287    | -0.321    |
|                  | $\gamma$ | 10.11     | 21.10     | 0;0            | 1.0;2.1        | 2.44     | -0.261    | -0.395    |
|                  | $\delta$ | 55.16     | 11.03     | 0;0.1          | 0.3;3.0        | 2.42     | -0.231    | -0.309    |
| Ag(111)          | $\alpha$ | 9.93      | 8.76      | 0;0            | 0.7;1.1        | 2.61     | -0.243    | -0.243    |
|                  | $\beta$  | 19.96     | 19.96     | 0;0            | 1.3;1.3        | 2.39     | -0.300    | -0.335    |
|                  | $\gamma$ | 10.23     | 26.70     | 0;0            | 2.2;2.6        | 2.26     | -0.255    | -0.388    |

|          |          |       |       |       |         |      |        |        |
|----------|----------|-------|-------|-------|---------|------|--------|--------|
|          | $\delta$ | 5.56  | 49.14 | 0.2;0 | 3.0;1.8 | 2.57 | -0.179 | -0.258 |
| Cu(111)  | $\alpha$ | 13.24 | 13.14 | 0.5;0 | 3.0;1.1 | 2.24 | -0.381 | -0.381 |
|          | $\beta$  | 9.98  | 9.98  | 0;0   | 2.4;2.4 | 2.16 | -0.536 | -0.570 |
|          | $\gamma$ | 10.23 | 26.70 | 0;0   | 0.1;0.5 | 2.00 | -0.454 | -0.587 |
|          | $\delta$ | 22.24 | 21.84 | 0.1;0 | 3.0;1.3 | 2.20 | -0.337 | -0.415 |
| Ni(111)  | $\alpha$ | 9.93  | 8.76  | 0;0   | 0.4;1.5 | 1.75 | -0.795 | -0.795 |
|          | $\beta$  | 9.98  | 9.98  | 0;0   | 1.1;1.1 | 1.88 | -0.931 | -0.965 |
|          | $\gamma$ | 10.23 | 21.36 | 0;0   | 2.6;1.0 | 1.83 | -0.857 | -0.991 |
|          | $\delta$ | 22.24 | 21.84 | 0;0   | 0.8;1.2 | 1.83 | -0.755 | -0.834 |
| Pt(111)  | $\alpha$ | 16.55 | 39.42 | 0;0   | 0.6;2.5 | 2.20 | -0.618 | -0.618 |
|          | $\beta$  | 16.63 | 16.63 | 0;0   | 0.1;0.1 | 1.99 | -0.816 | -0.850 |
|          | $\gamma$ | 13.64 | 37.38 | 0;0   | 1.7;2.8 | 1.90 | -0.690 | -0.824 |
|          | $\delta$ | 33.36 | 5.52  | 0;0   | 0.8;1.6 | 2.05 | -0.569 | -0.648 |
| Ru(0001) | $\alpha$ | 23.17 | 13.14 | 0;0   | 1.1;2.8 | 1.95 | -0.649 | -0.649 |
|          | $\beta$  | 13.30 | 13.30 | 0;0   | 1.7;1.7 | 1.98 | -0.821 | -0.855 |
|          | $\gamma$ | 23.87 | 10.68 | 0;0   | 1.8;1.3 | 1.97 | -0.828 | -0.962 |
|          | $\delta$ | 27.80 | 10.92 | 0;0   | 1.1;0.9 | 1.93 | -0.698 | -0.777 |

## Reference

- 1) J. Guan, Z. Zhu, and D. Tománek, *Phys. Rev. Lett.*, 2014, **113**, 046804
- 2) G. Kresse, and J. Hafner, *Phys. Rev. B.*, 1993, **48**, 13115.
- 3) G. Kresse, and J. Furthmüller, *Comput. Mater. Sci.*, 1996, **6**, 15.
- 4) G. Kresse, and D. Joubert, *Phys. Rev. B.*, 1999, **59**, 1758.
- 5) J. P. Perdew, K. Burke, and M. Ernzerhof, *Phys. Rev. Lett.*, 1996, **77**, 3865.
- 6) S. Grimme, *J. Comput. Chem.*, 2006, **27**, 1787-1799.
- 7) H. Monkhorst, and J. Pack, *Phys. Rev. B.*, 1976 , **13**, 5188–5192.
